# Supplementary material for: NLRP3 inflammasome inhibition attenuates sepsis-induced platelet activation and prevents multi-organ injury in cecal-ligation puncture
Source: PubMed Central journal article supplement (PMC7299389; doi:10.1371/journal.pone.0234039), 2020-06-17

# Raw Western Blot Images

# Lung NLRP3 and $\beta$ -actin

## NLRP3 Blot

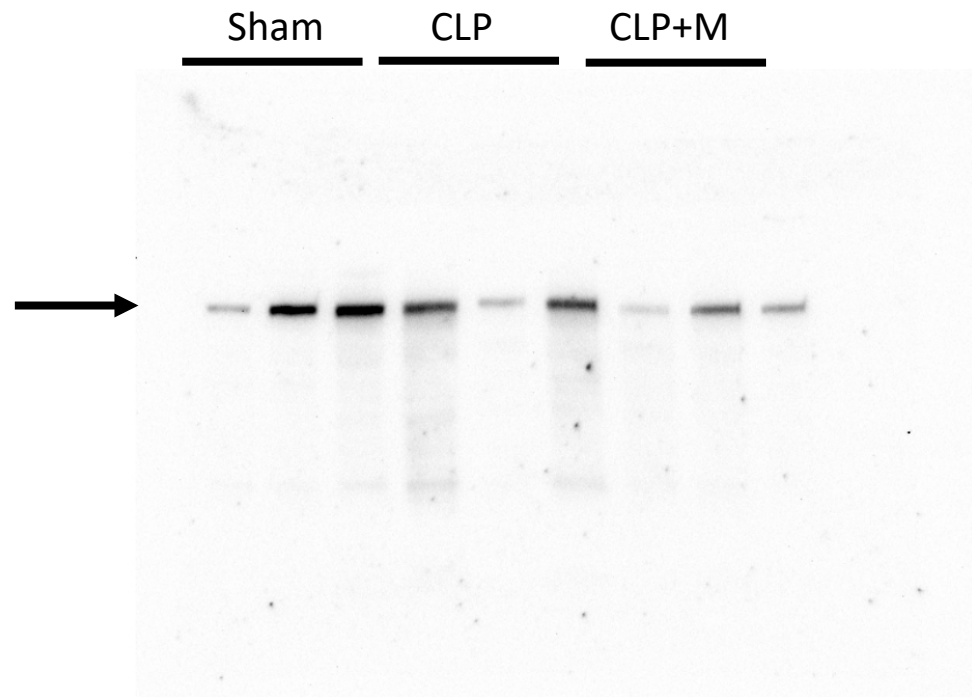

## $\beta$ -actin Blot

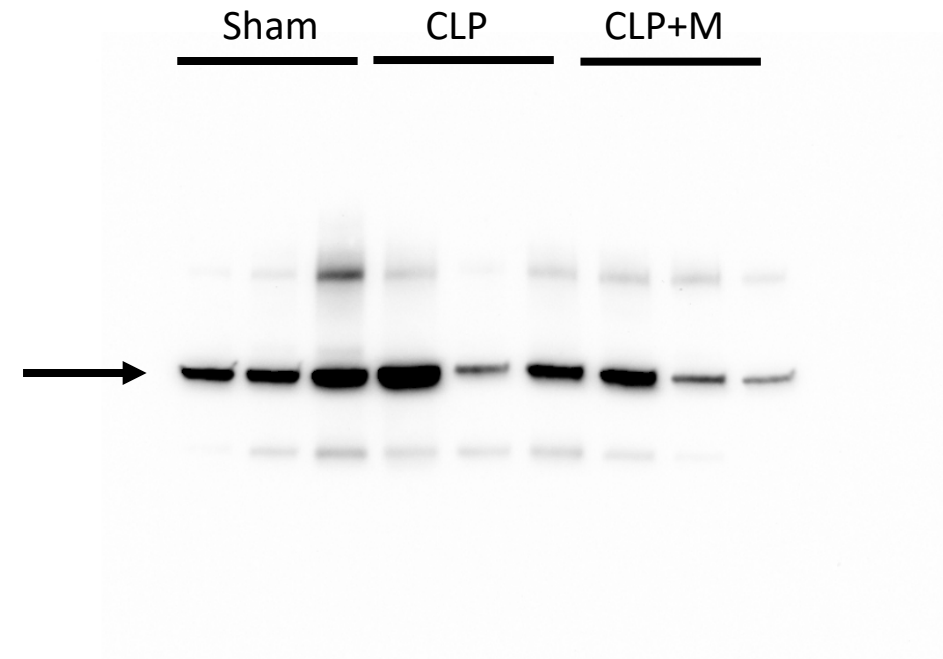

# Kidney NLRP3 and $\beta$ -actin

NLRP3 Blot

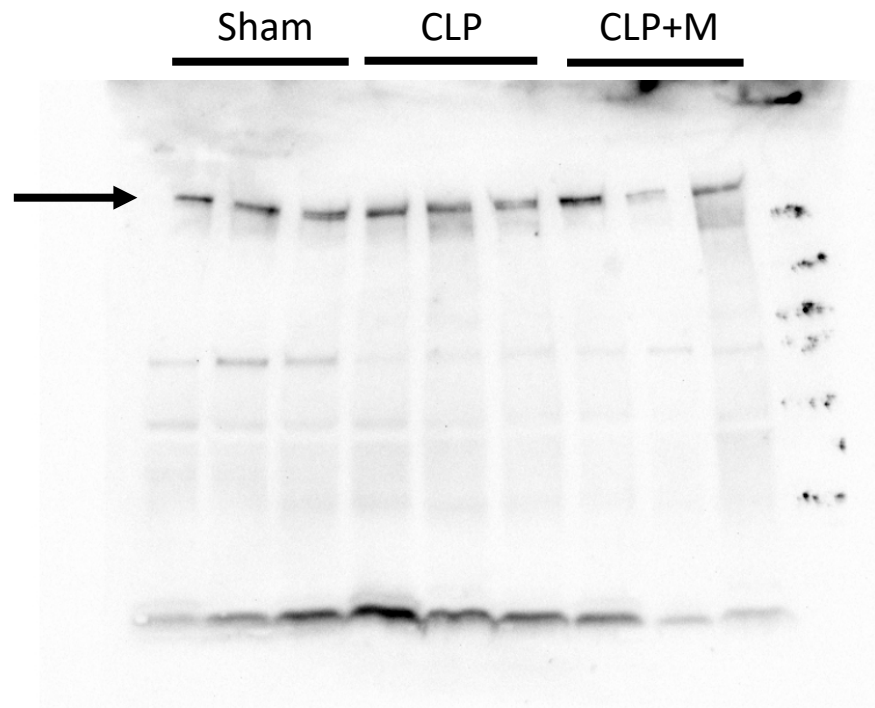

$\beta$ -actin Blot

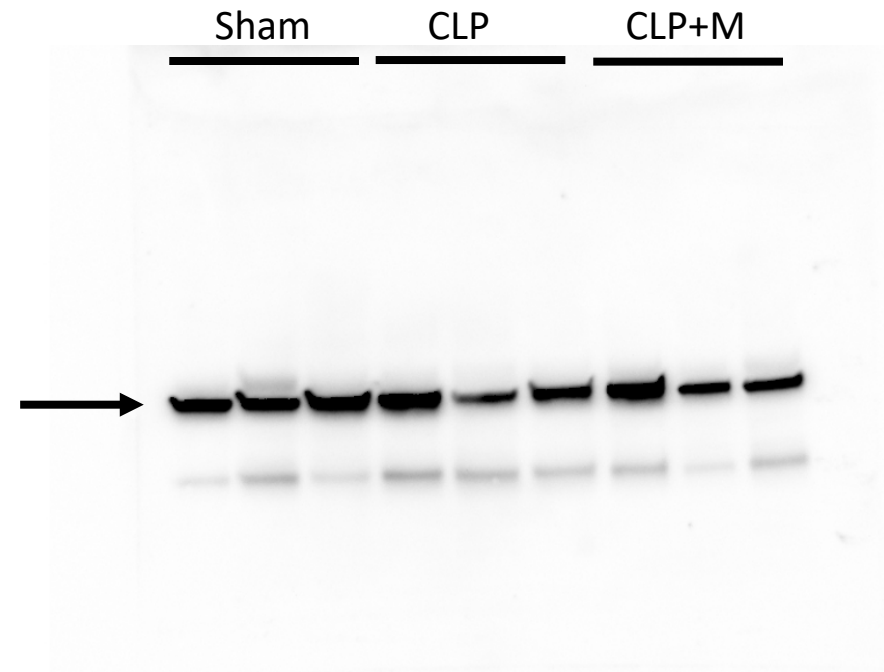

# Lung Caspase-1 and $\beta$ -actin

## Caspase 1 Blot

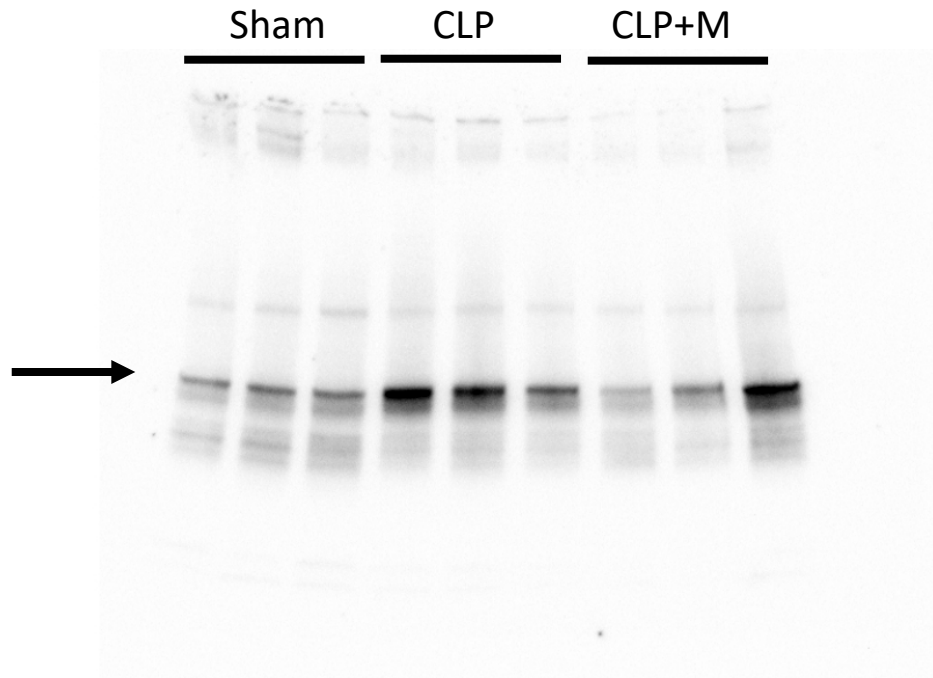

## $\beta$ -actin Blot

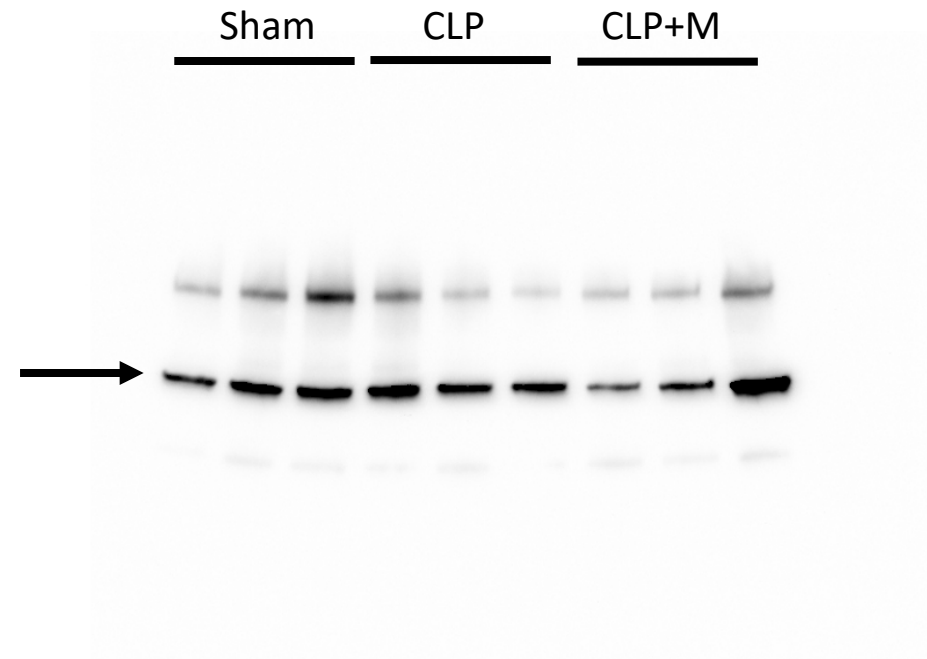

# Kidney Caspase-1 and $\beta$ -actin

## Caspase 1 Blot

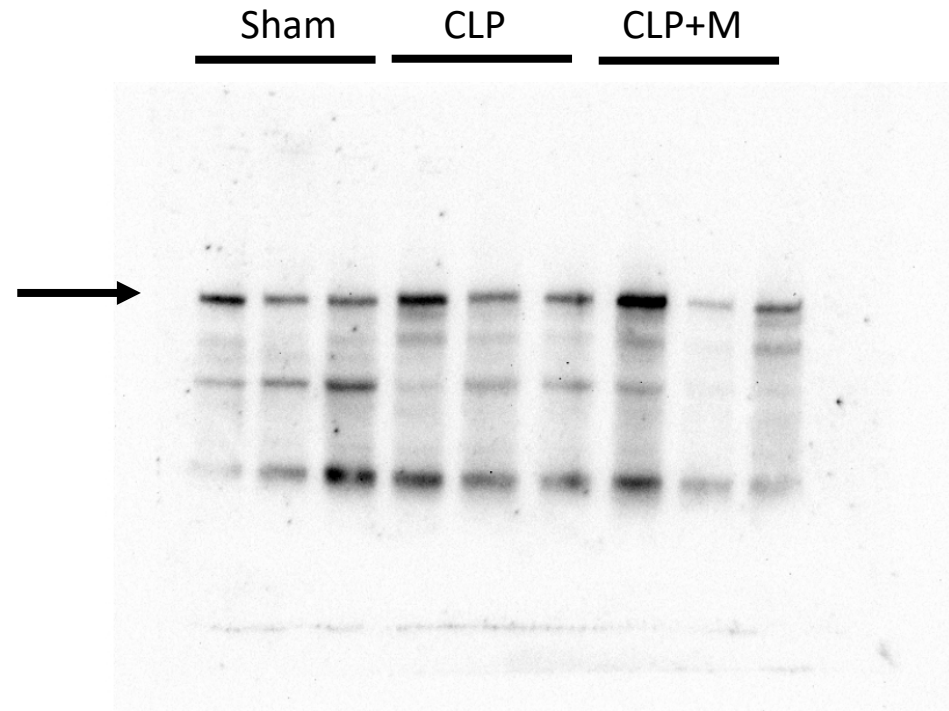

## $\beta$ -actin Blot

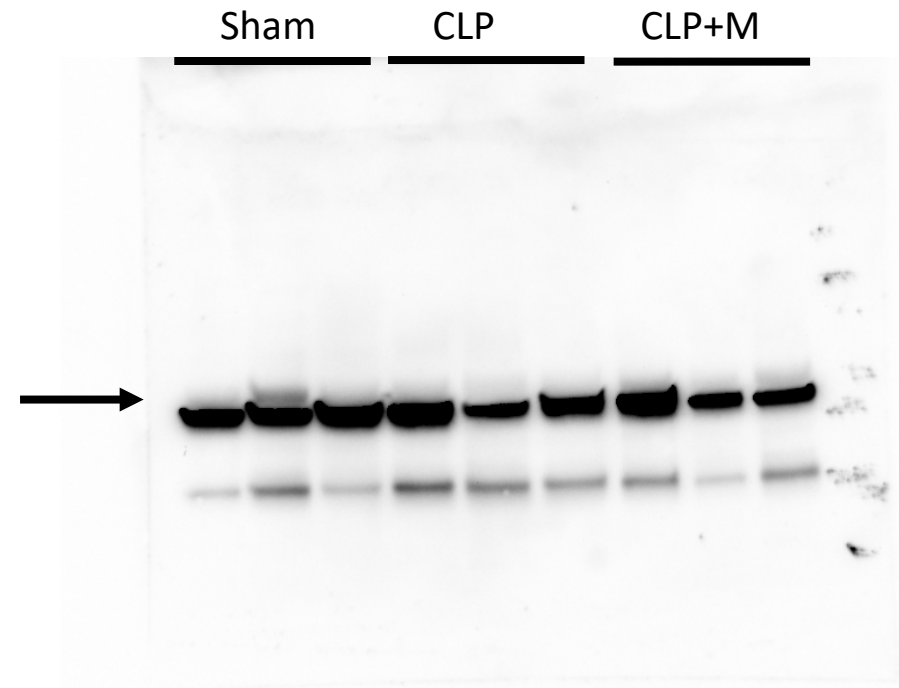

Supplement: pone.0234039.s001.pdf [file pone.0234039.s001.pdf]
